# Supplementary material
Source: PubMed Central journal article supplement (PMC6974637)
Supplement: zam003209578s1.pdf [file zam003209578s1.pdf]

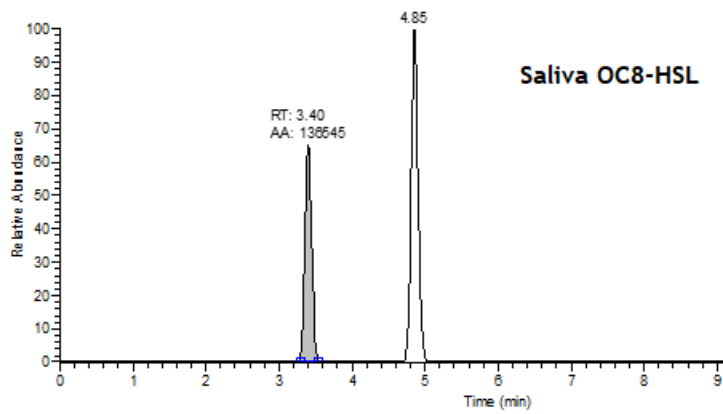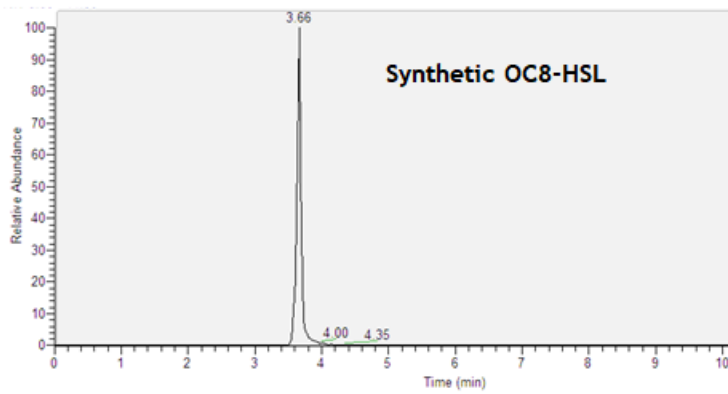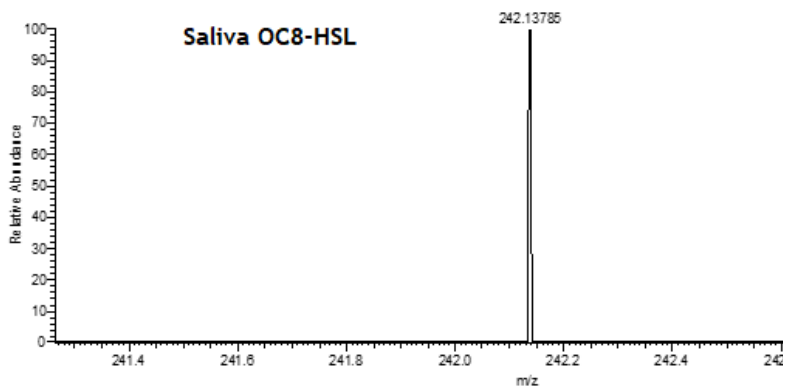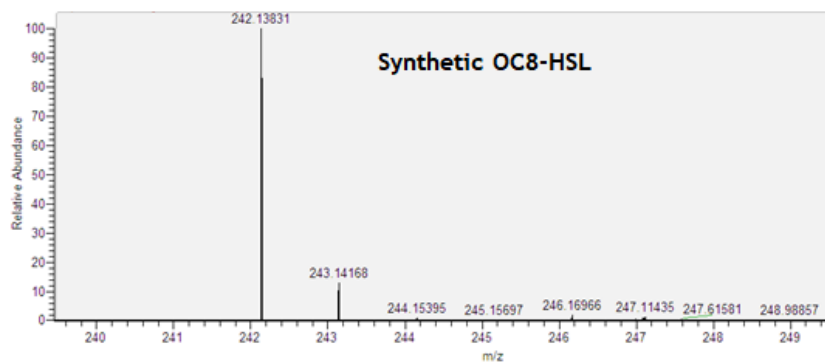

**Supplementary Figure 1.** Ion chromatograms from HPLC-MS analysis of OC8-HSL(C) with retention time and identification of peaks detected in saliva samples and synthetic standards.

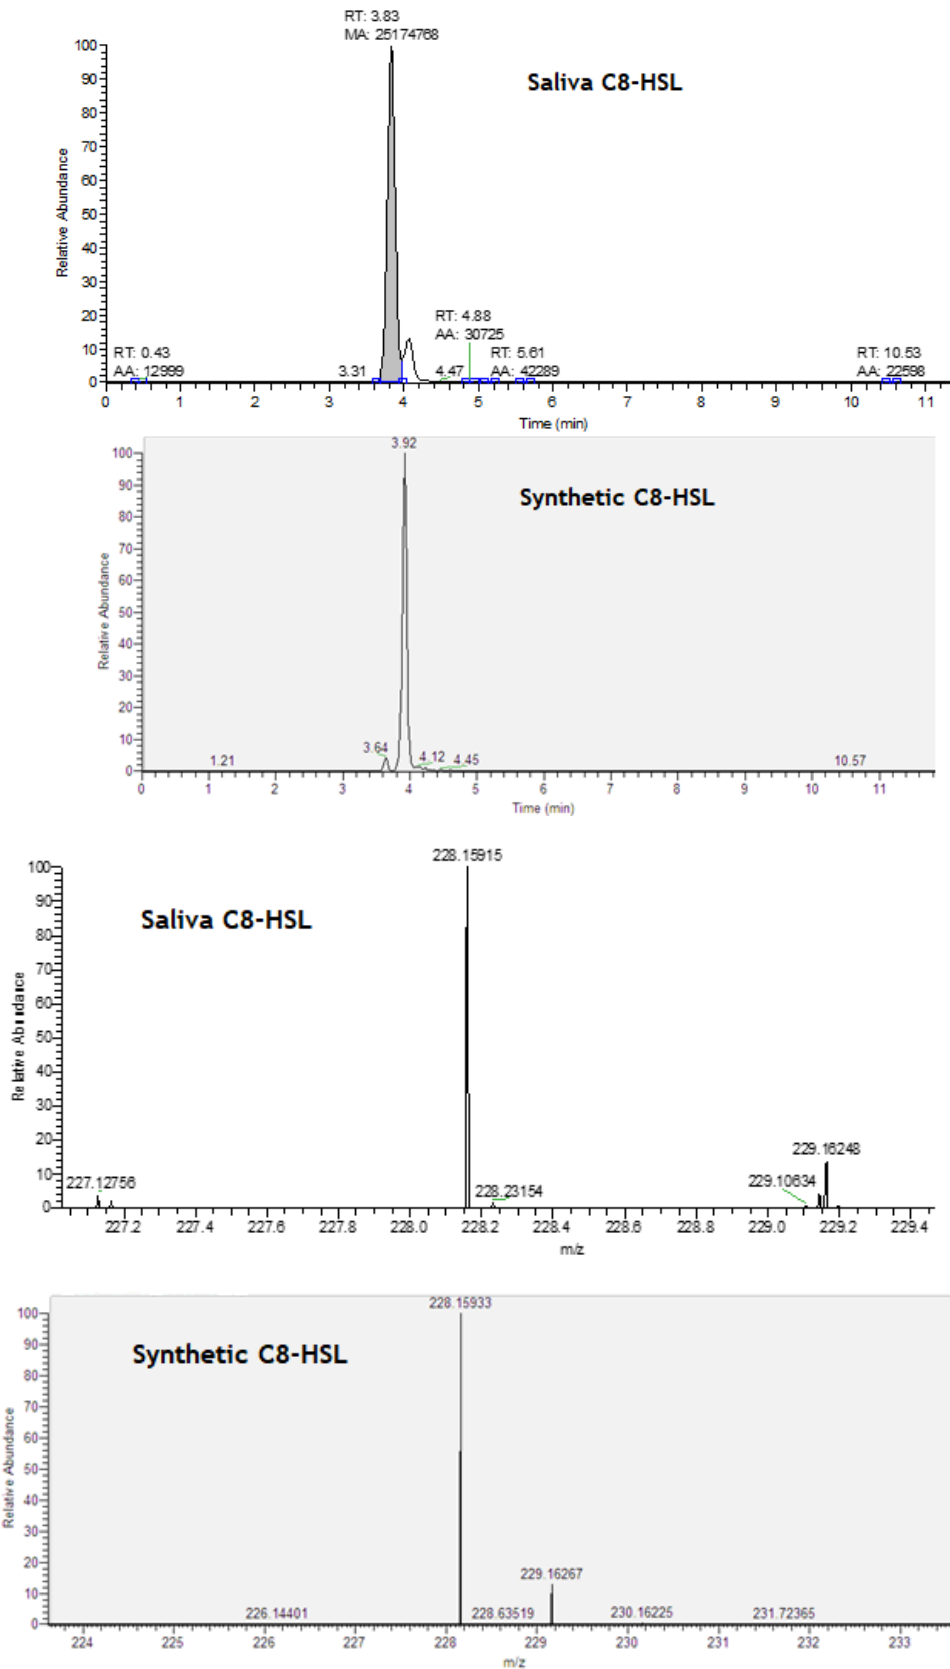

**Supplementary Figure 2.** Ion chromatograms from HPLC-MS analysis of C8-HSL with retention time and identification of peaks detected in saliva samples and synthetic standards.

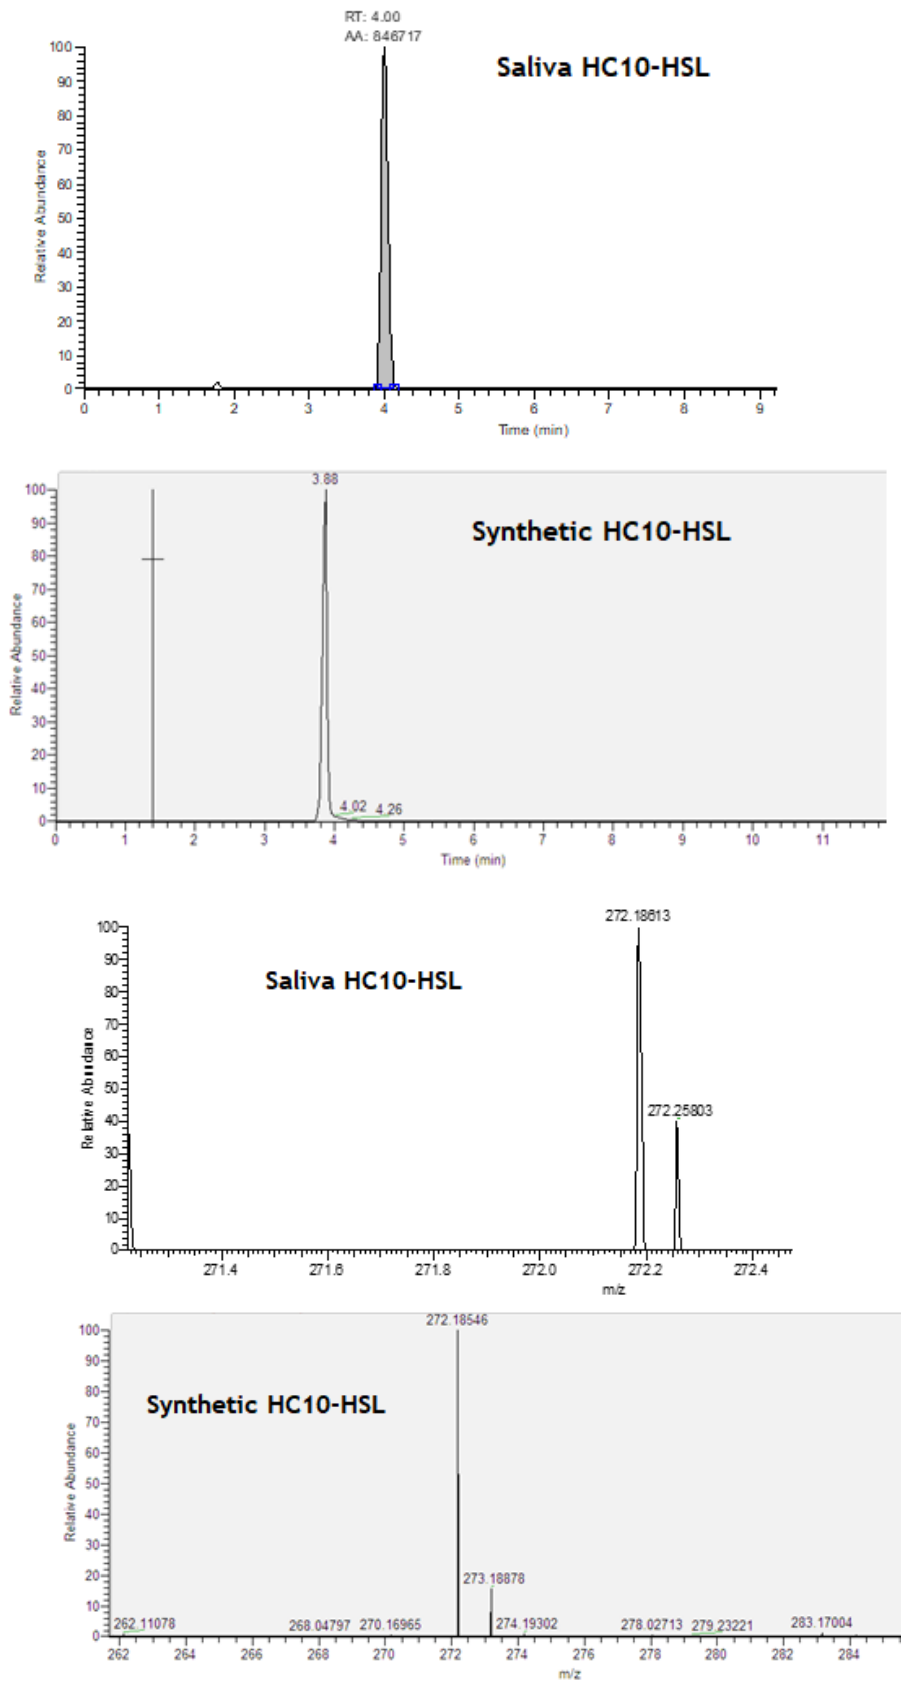

**Supplementary Figure 3.** Ion chromatograms from HPLC-MS analysis C10-HSL with retention time and identification of peaks detected in saliva samples and synthetic standards.

**A**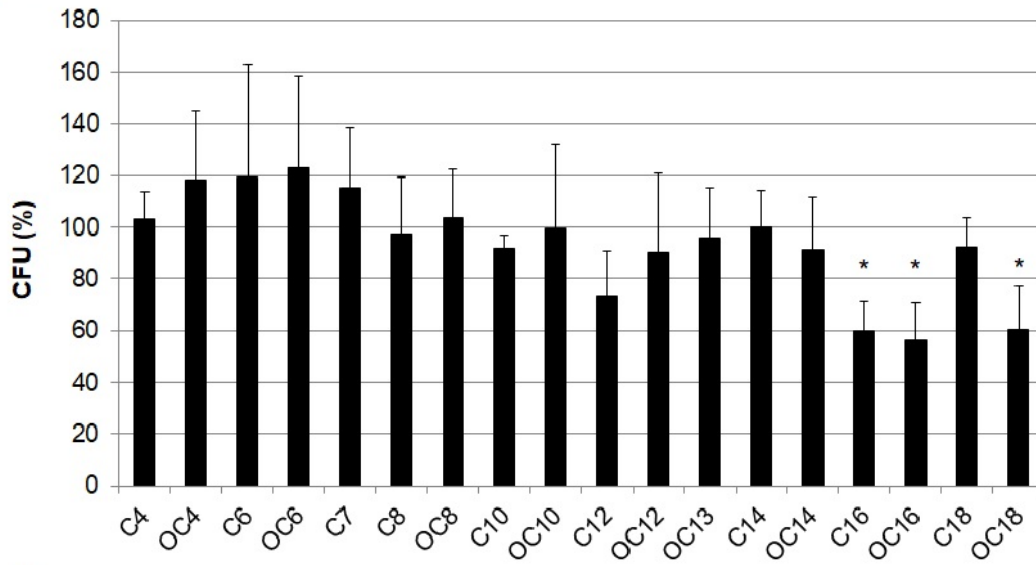**B**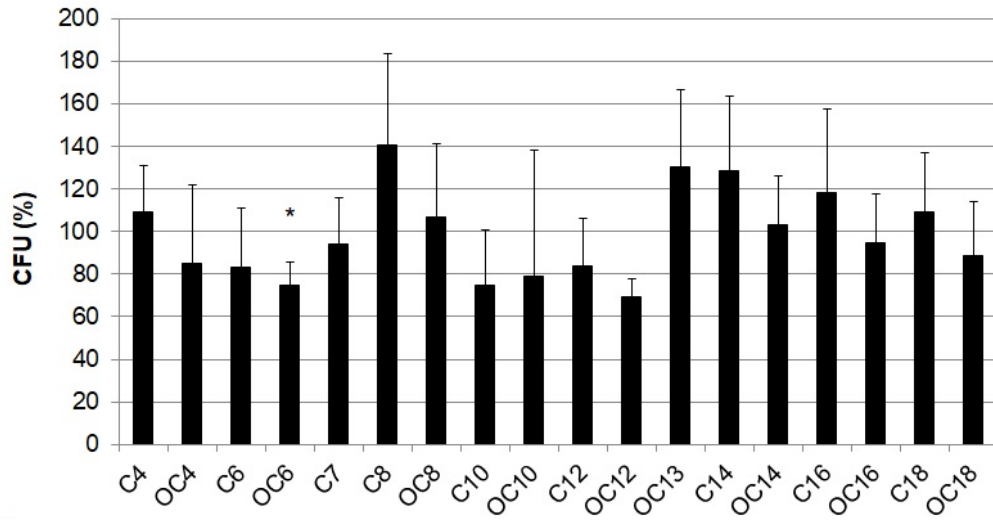**C**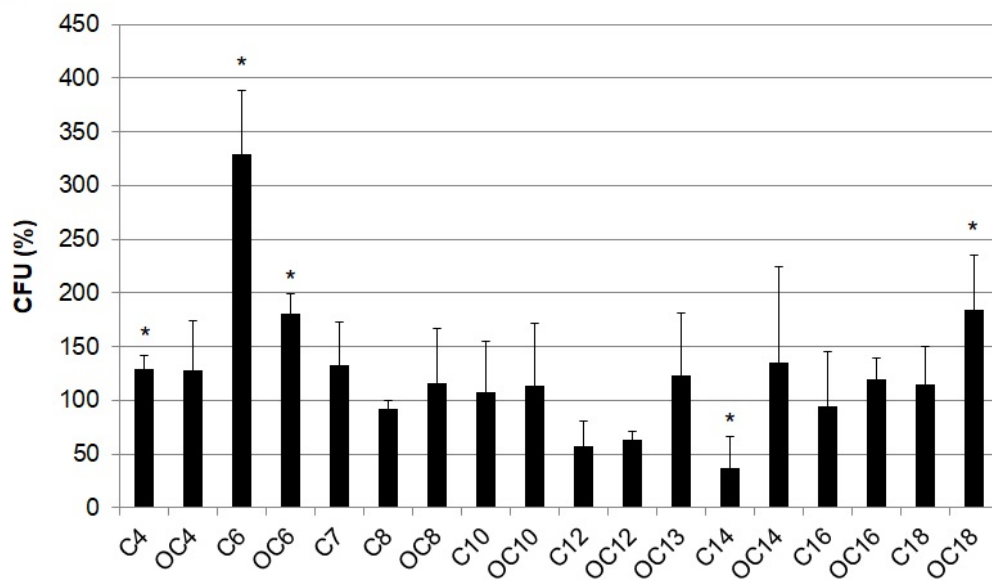

**Supplementary Figure 4.** Effect of different AHLs (1  $\mu$ M) on cariogenic (A), commensal (B) and periodontal (C) biofilm formation (CFUs/biofilm). Data are presented as the means  $\pm$  SD (n=4). The significant difference compared to untreated controls was indicated with \*(Welch's Test, p<0.05) and \*\*(Welch's Test, p<0.01).

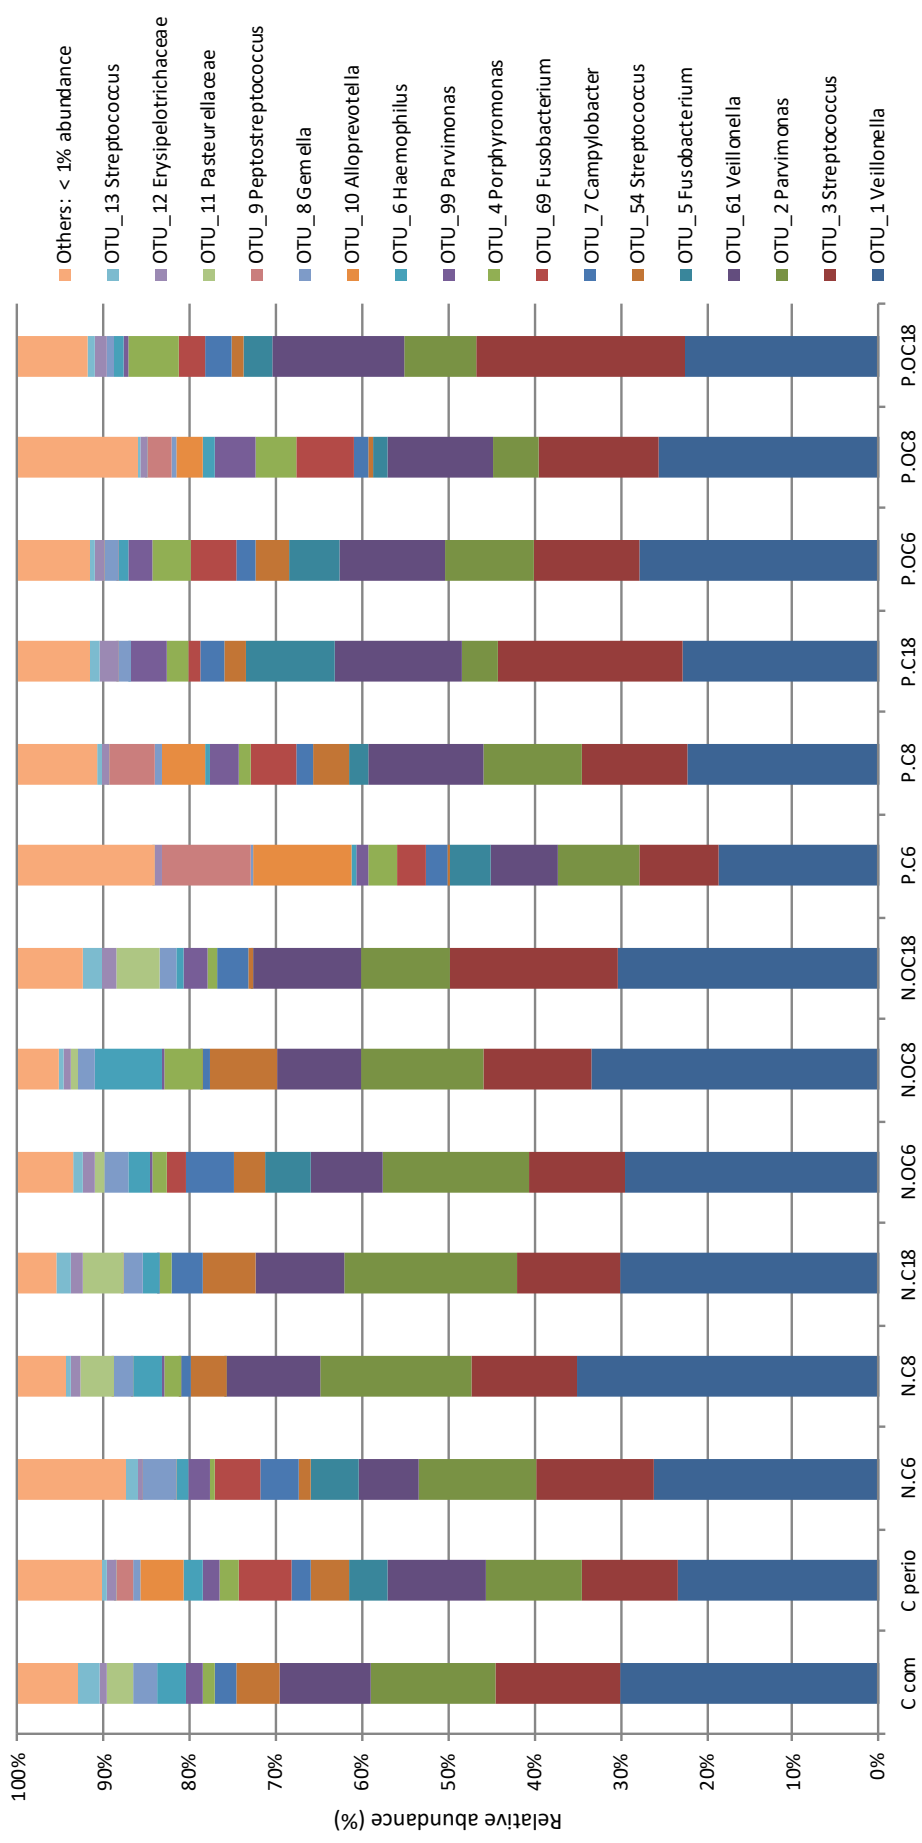

**Supplementary figure 5.** Taxonomic profiles (at OTU-level) depicting the bacterial composition of the *in vitro* oral biofilms in % relative abundance. Filtering was performed based on total OTU abundance over all samples. All OTU's lower than 1% are depicted as "others".

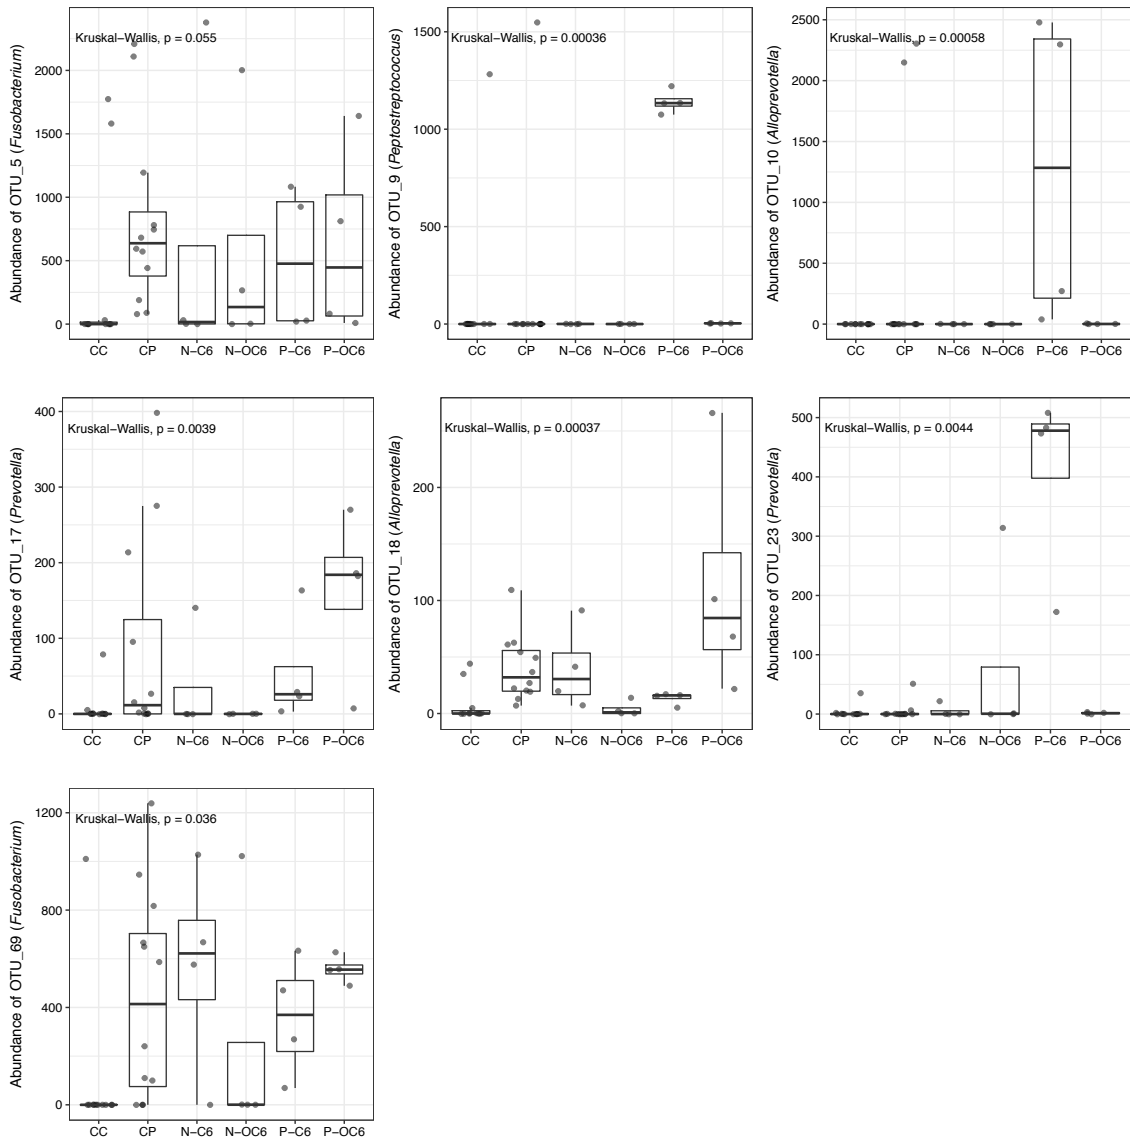

**Supplementary Figure 6.** Effects of C6 and OC6 addition on individual OTUs responsible for the shift induced by C6 in *in vitro* periodontal biofilms.
